# Supplementary material for: Reactions of Cadmium(II) Halides and Di-2-Pyridyl Ketone Oxime: One-Dimensional Coordination Polymers
Source: MDPI journal article supplement (doi:10.3390/molecules29020509), 2024-01-19
Supplement: s1 [file s1]

## Supplementary Materials:

### Reactions of Cadmium(II) Halides and Di-2-pyridyl Ketone Oxime: One-dimensional Coordination Polymers

Christina Stamou, Pierre Dechambenoit, Zoi G. Lada, Patroula Gkolfi, Vassiliki Riga, Catherine P. Raptopoulou, Vassilis Psycharis, Konstantis F. Konidaris, Christos T. Chasapis and Spyros P. Perlepes

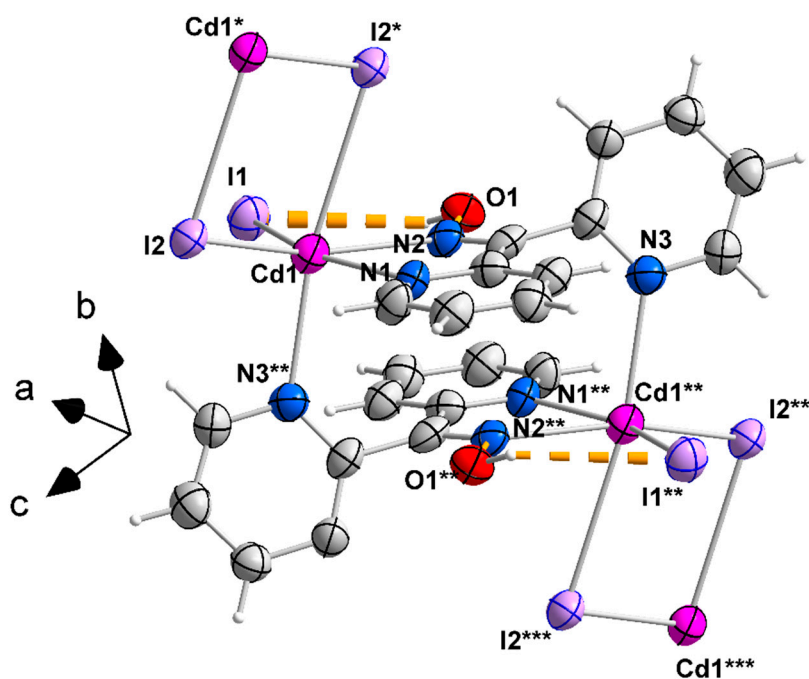

**Figure S1.** Complete coordination spheres of two neighboring Cd<sup>II</sup> centers (Cd1, Cd1\*\*) in one zigzag chain of complex 3. The symmetry codes are the same with those mentioned for compound 2 in Figure 2b.

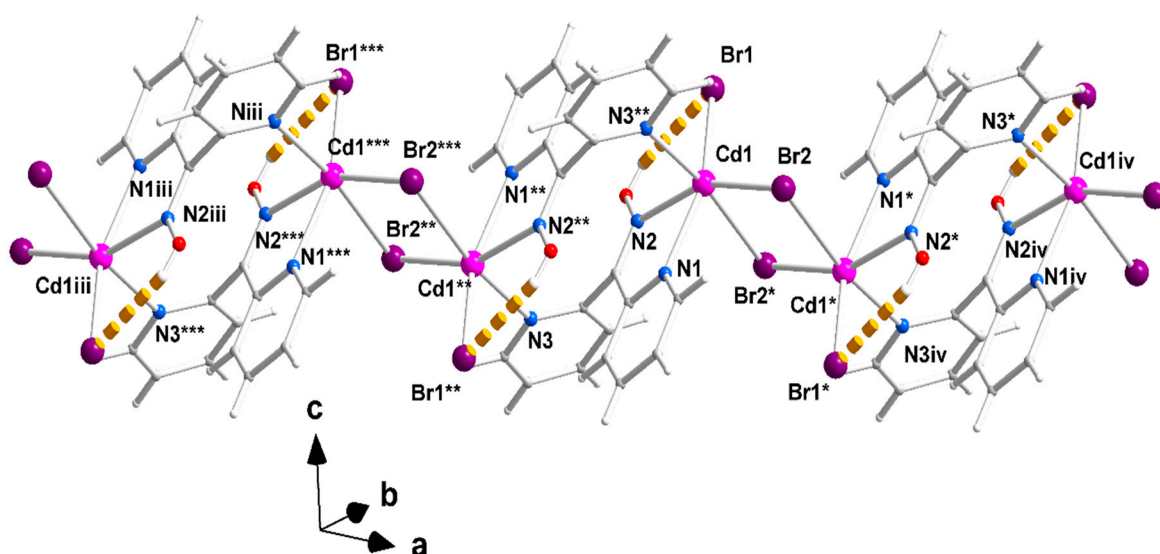

**Figure S2.** A portion of one zigzag chain (developed along the [1, 1, 0] crystallographic direction) of complex **2**. The thick dashed orange lines represent intrachain  $O_{\text{oxime}}\text{-H}\cdots\text{Br}_{\text{terminal}}$  H bonds. The symmetry codes (\*), (\*\*) and (\*\*\*) are the same with those described in Figure 2b, and the additional codes are: (iii)  $0.5-x, 0.5-y, 1-z$  and (iv)  $0.5+x, 0.5+y, z$ .

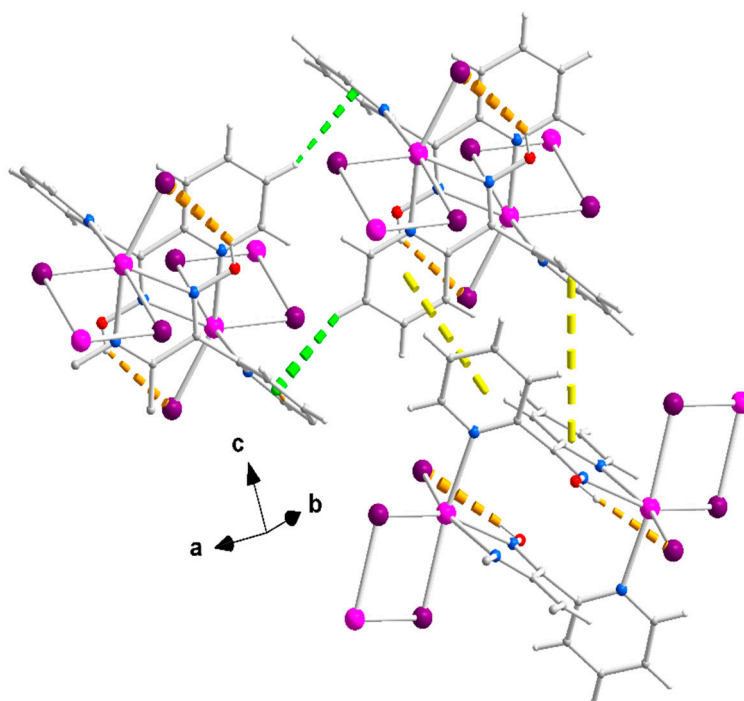

**Figure S3.** Interactions between neighboring chains in the crystal structure of compound **2**. The thick dashed light green and yellow lines indicate  $\text{C2-H2}\cdots\text{Cg1}$  ( $\text{C-H}\cdots\pi$ ) and  $\pi$ - $\pi$  interactions, respectively; for details, see text. The thick dashed orange lines represent intrachain  $O_{\text{oxime}}\text{-H}\cdots\text{Br}_{\text{terminal}}$  H bonds (also see Figures 2b and 4).

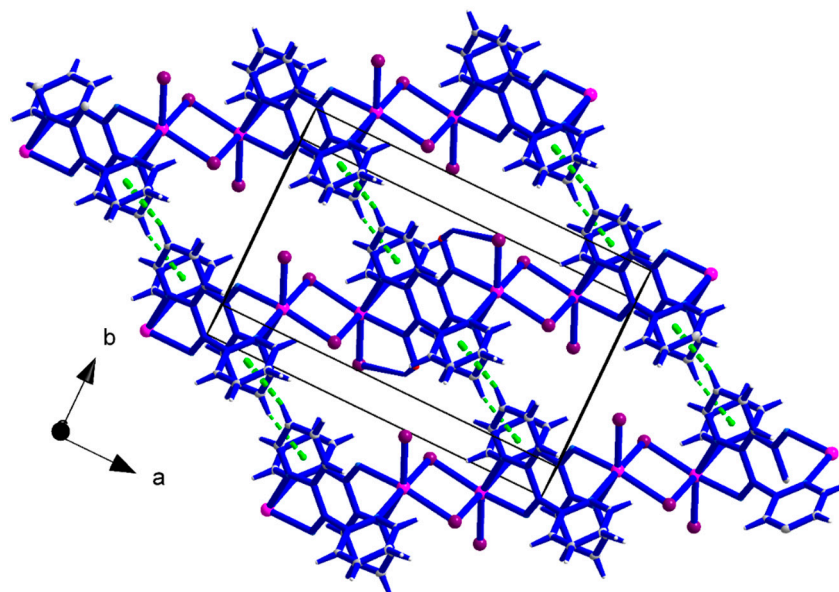

**Figure S4.** Layers of chains parallel to the (001) crystallographic planes in the structures of **2** and **3**. The chains are represented by thick blue solid lines and the C2-H2...Cg1 (C-H... $\pi$ ) interactions are indicated with thick dashed light green lines; for details, see text.

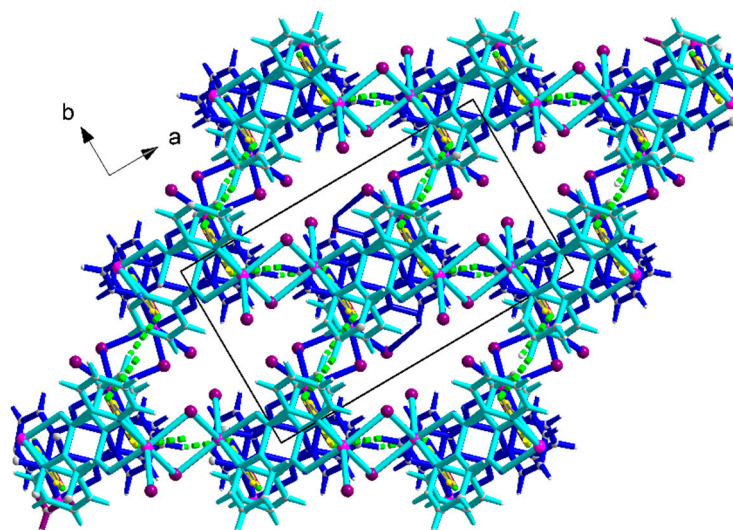

(a)

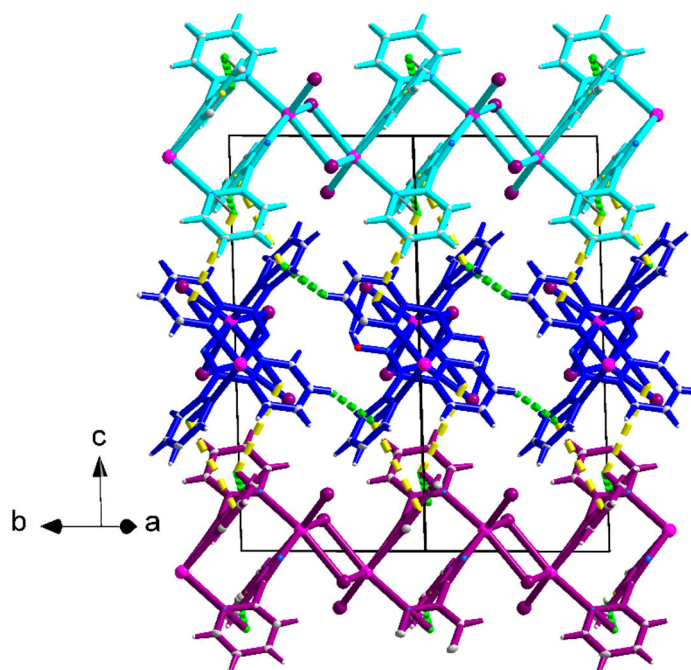

(b)

**Figure S5.** (a) Neighboring layers of **2** and **3** stacked along the  $c$  axis with a crossed-arrangement fashion relative to each other; in the top layer (cyan solid lines), the chains extend along the  $[-1, 1, 0]$  direction and in the bottom one (blue solid lines) along  $[1, 1, 0]$ . (b) Alternate stacking in **2** and **3** along the  $c$  axis; at the bottom (violet solid lines) and top (cyan solid lines) layers, the chains are along  $[-1, 1, 0]$  and in the middle one (blue solid lines) are along  $[1, 1, 0]$ . The thick dashed yellow and light green lines indicate  $C-H\cdots\pi$  and  $\pi-\pi$  interactions; see also caption of Figure S2.

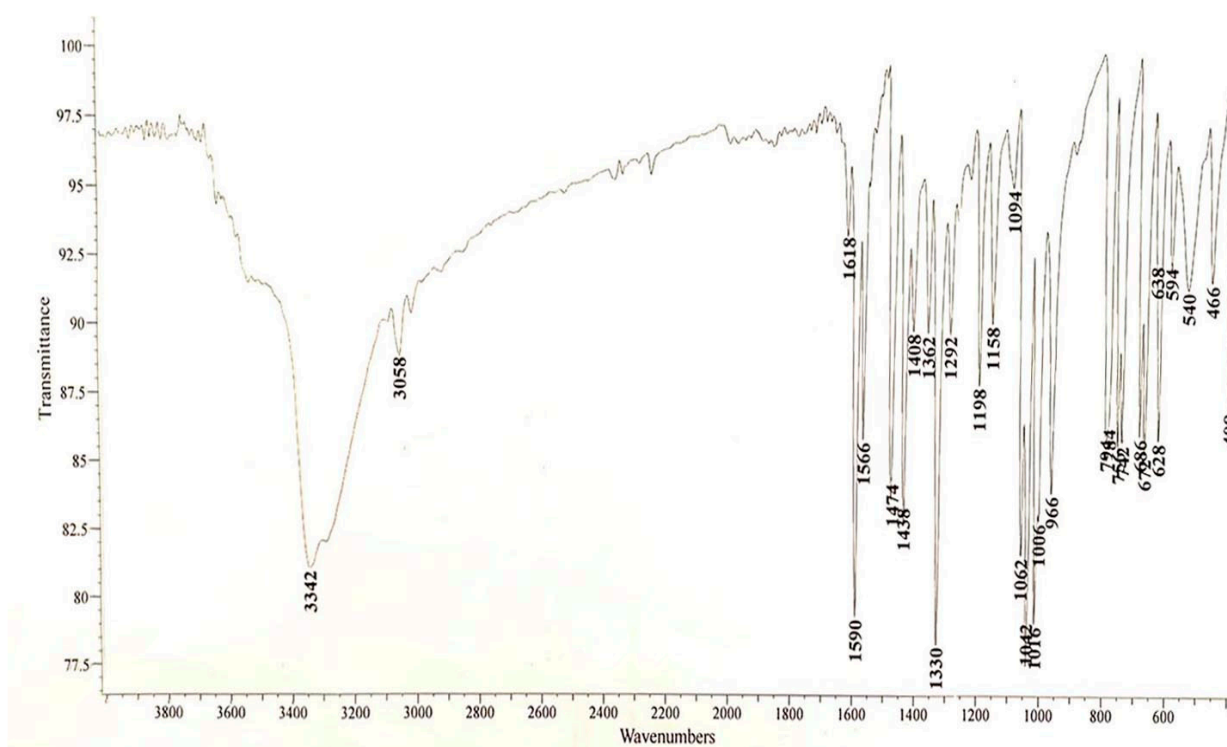

**Figure S6.** The IR spectrum (KBr,  $\text{cm}^{-1}$ ) of the 1D polymer 2.

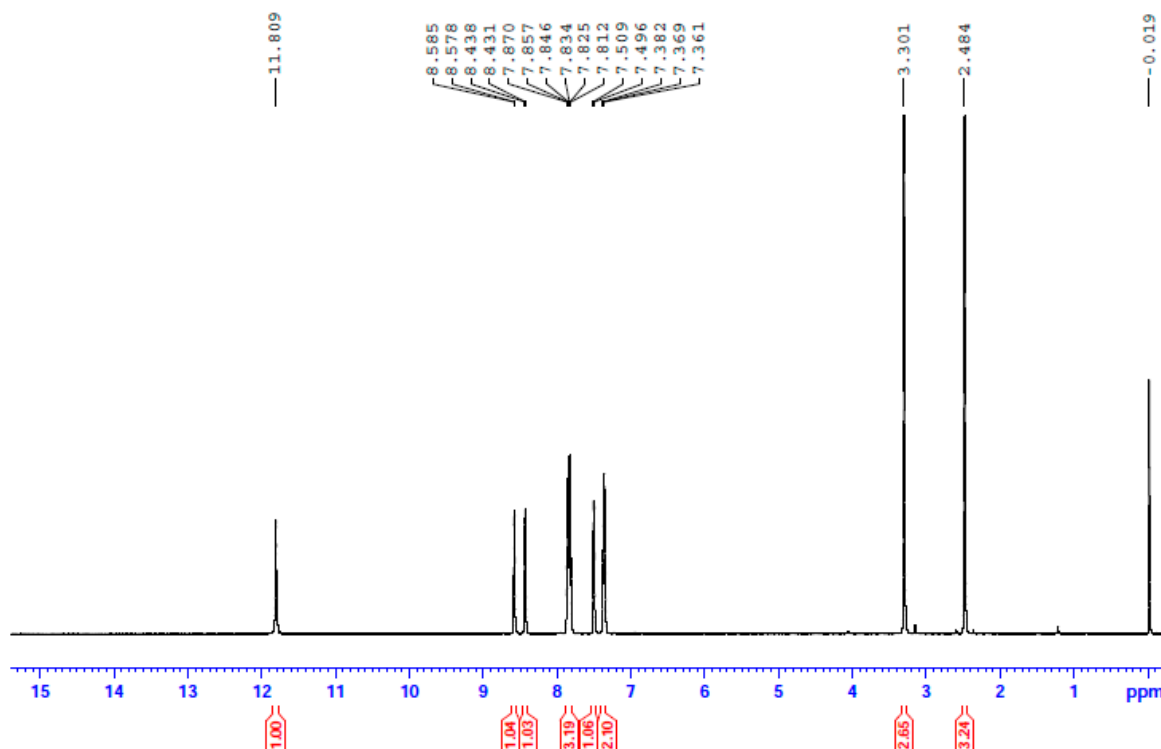

**Figure S7.** The  $^1\text{H}$  NMR spectrum of  $1 \cdot 2\text{H}_2\text{O}$  in  $\text{d}_6\text{-DMSO}$ . The signal at  $\delta$  2.48 ppm is due to the methyl groups of the non-deuteriated amount of the solvent, and the signal at  $\delta$  3.30 ppm to the protons of the lattice  $\text{H}_2\text{O}$  and the water content of the solvent.

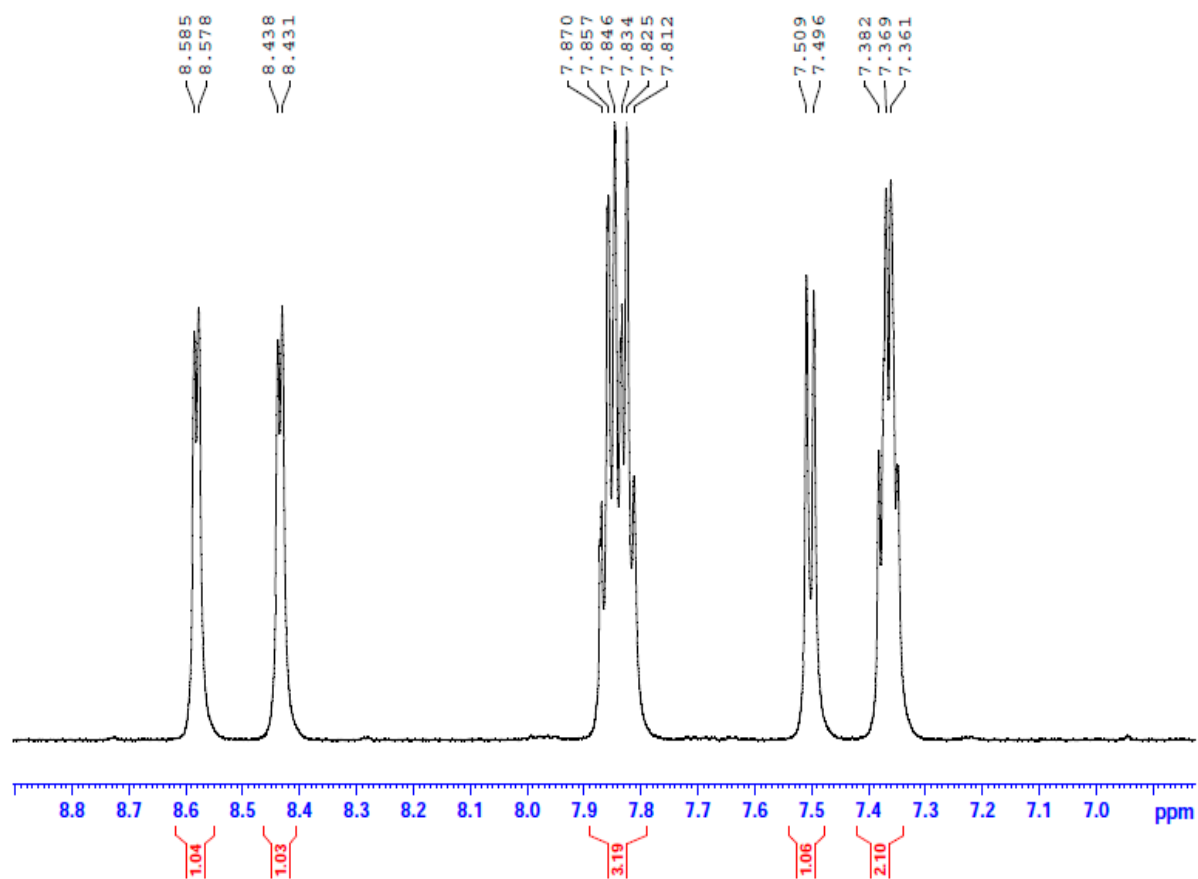

**Figure S8.** The  $^1\text{H}$  NMR spectrum of 2 in  $\text{d}_6$ -DMSO in the aromatic region.
